# Supplementary material for: Synthesis of hierarchical mordenite by solvent-free method for dimethyl ether carbonylation reaction
Source: Royal Society of Chemistry journal article supplement (doi:10.1039/d3ra08141a), 2024-01-01
Supplement: d3ra08141a1.pdf [file d3ra08141a1.pdf]

*Supporting Information for*

**Synthesis of Hierarchical Mordenite by Solvent-free Method  
for Dimethyl Ether Carbonylation Reaction**

Xiaosheng Wang<sup>1\*†</sup>, Shaoduo Liu<sup>1,2†</sup>, Hongjing Wang<sup>1</sup>, Yinghui Liu<sup>1</sup>, Yangyang Zhang<sup>1</sup>,  
Ranjia Li<sup>1</sup>, Changchun Yu<sup>1</sup>, Kun Ren<sup>1</sup>, Pengcheng Yang<sup>3</sup>

(1: State Key Laboratory of Heavy Oil Processing, College of New Energy and Materials, China  
University of Petroleum-Beijing, Beijing 102249, PR China;

2: Synfuels China Co. Ltd, Beijing, 101407, PR China;

3: Shandong Hi-tech Spring Material Technology Co. Ltd, Dongying, 257000, PR China)

---

\* Corresponding author. E-mail: [wxs880620@cup.edu.cn](mailto:wxs880620@cup.edu.cn).

† These two authors contribute to this work equally.

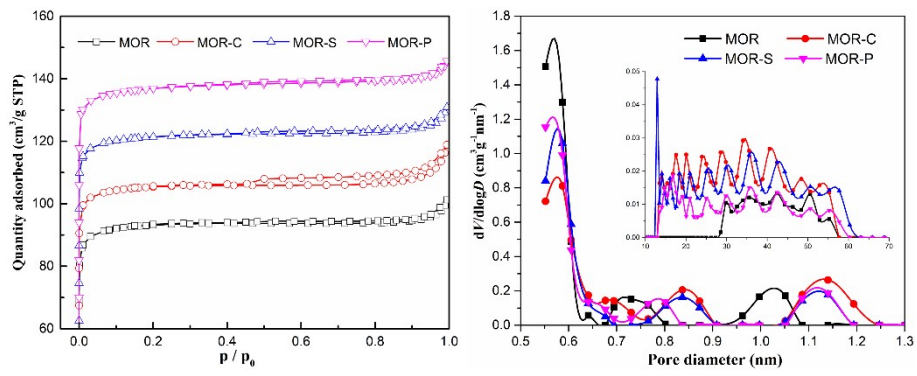

Fig. S1 N<sub>2</sub> adsorption and desorption isotherms (a) and pore size distribution (b) of MOR samples

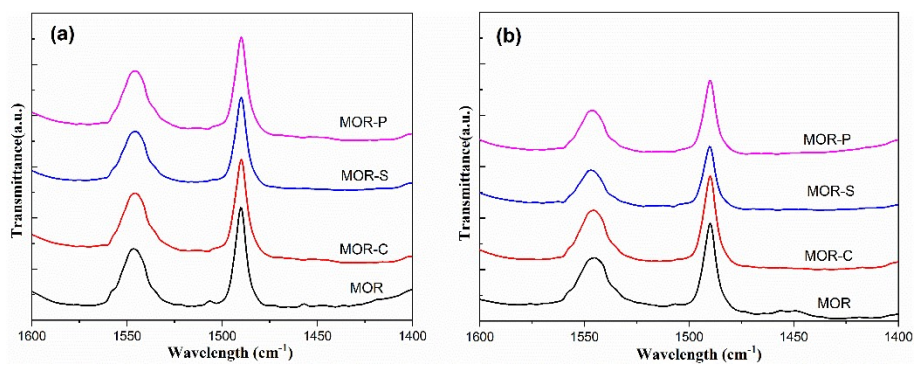

Fig. S2 Py-IR spectra of MOR synthesized with different soft template (a: Py desorpted at 150 °C; b: Py desorpted at 300 °C)
